1

# Impact of exposure frequency on disease burden of the common cold - a mathematical modeling perspective

Sebastian Gerdes<sup>1</sup>, Michael Rank<sup>1</sup>, Ingmar Glauche<sup>1</sup> and Ingo Roeder<sup>1,\*</sup>

<sup>1</sup>*Institute for Medical Informatics and Biometry, Carl Gustav Carus Faculty of Medicine, Technische Universität Dresden, Germany*

Correspondence\*:

Ingo Roeder, TUD Dresden University of Technology, IMB, Fetscherstraße 74,  
01307 Dresden, Germany  
[ingo.roeder@tu-dresden.de](mailto:ingo.roeder@tu-dresden.de)

## 2 ABSTRACT

3 The common cold is a frequent disease in humans and can be caused by a multitude of  
4 different viruses. Despite its typically mild nature, the high prevalence of the common cold causes  
5 significant human suffering and economic costs. Oftentimes, strategies to reduce contacts are  
6 used in order to prevent infection. To better understand the dynamics of this ubiquitous ailment,  
7 we develop two novel mathematical models: the common cold ordinary differential equation  
8 (CC-ODE) model at the population level, and the common cold individual-based (CC-IB) model  
9 at the individual level. Our study aims to investigate whether the frequency of population /  
10 individual exposure to an exemplary common cold pathogen influences the average disease  
11 burden associated with this virus.

12 On the one hand, the CC-ODE model captures the dynamics of the common cold within a  
13 population, considering factors such as infectivity and contact rates, as well as development of  
14 specific immunity in the population. On the other hand, the CC-IB model provides a granular  
15 perspective by simulating individual-level interactions and infection dynamics, incorporating  
16 heterogeneity in contact rates.

17 By employing these models, we explore the impact of exposure frequencies upon the net  
18 disease burden of common cold infections in theoretical settings. In both modeling approaches,  
19 we show that under specific parameter configurations (i.e., characteristics of the virus and the  
20 population), increased exposure can result in a lower average disease burden. While increasing  
21 contact rates may be ethically justifiable for low-mortality common cold pathogens, we explicitly do  
22 not advocate for such measures in severe illnesses. The mathematical approaches we introduce  
23 are simple yet powerful and can be taken as a starting point for the investigation of specific  
24 common cold pathogens and scenarios.

25 **Keywords:** common cold, reinfection, mathematical model, infectious disease, SIR model, disease burden, contact pattern, waning of  
26 immunity

NOTE: This preprint reports new research that has not been certified by peer review and should not be used to guide clinical practice.

## 1 INTRODUCTION

### 27 1.1 Biological background

28 The common cold is a frequent disease in humans and is generally caused by viral infection of the upper  
29 respiratory tract (Thomas and Bomar, 2022). Although mild in most cases, it poses a significant disease  
30 burden on individuals and societies, both in terms of human suffering and economic loss. The common cold  
31 is the most frequent illness in the US with approximately 25 million documented cases per year (Passiotti  
32 et al., 2014). It is estimated that in the US alone, the economic cost of the common cold is approximately  
33 \$25 billion per year (Bramley et al., 2002). Despite the large number of cases and the great associated  
34 disease and economic burden the common cold is currently not a prioritized research topic. A thorough  
35 and precise understanding of the disease dynamics both an a societal and an individual level are lacking  
36 today, but might pave the way to better prevention and treatment strategies.

37 The most frequent causative viral agents are rhino viruses (approx. 30% to 50%), corona viruses (approx.  
38 10% to 15%, not including SARS-CoV-1, SARS-CoV-2 and MERS), influenza viruses (approx. 5% to  
39 15%), respiratory syncytial viruses (approx. 5%), parainfluenza viruses (approx. 5%), adeno viruses (less  
40 than 5%), entero viruses (less than 5%), and further unknown viruses (approx. 20% to 30%) (Heikkinen  
41 and Järvinen, 2003). Of these viruses, different strains are circulating and they are constantly subjected to  
42 genetic shift and drift.

43 The immune system is generally capable of clearing a common cold without additional treatment. In  
44 healthy individuals the symptoms are often relatively mild (including sneezing, stuffy nose, runny nose,  
45 sore throat, coughing, post-nasal drip, watery eyes, fever). Most often, the intensity of symptoms peaks  
46 around day 3 or 4 and around day 7 recovery begins (Heikkinen and Järvinen, 2003). The median duration  
47 of symptoms of a common cold has been estimated to be approximately 11 days (Arruda et al., 1997).

48 In fighting a common cold, different components of the immune system are involved (Murphy et al.,  
49 2022). Generally, the infectious agent enters via the mucous membranes. Here, both specific and unspecific  
50 components of the immune system can often already eliminate the infectious agent. In this case, the  
51 exposure may result in an asymptomatic course, however, possibly involving training of the immune  
52 system. If the infectious agent settles and proliferates, typical symptoms of a common cold may develop.  
53 Over time, more powerful components of the specific immune system come into play. In particular,  
54 the specific immune system continuously improves its ability to recognize the pathogen and efficiently  
55 eliminates it.

56 After the infection has subsided, the immune system usually retains the ability to recognize the respective  
57 pathogen for a while. Hence, after immediate reexposure, it is unlikely that another symptomatic infection  
58 occurs. However, with time the newly acquired specific immunity generally deteriorates and may even  
59 revert to the baseline level. Furthermore, it is important to note that there is significant cross-reactivity  
60 between different virus strains, e.g. in the case of rhinoviruses (Glanville et al., 2013), and possibly even  
61 between different viruses. Therefore, a symptomatic infection may be alleviated or prevented after exposure  
62 to a virus, if an infection with a similar virus or virus strain has occurred previously (see figure 1).

63 The degree of persistence of specific immunity seems to differ considerably between different common  
64 cold pathogens (Turner, 2015). Infections with rhinoviruses and adenoviruses seem to generally result in  
65 long-term, protective immunity against the specific virus serotype, however, not against other serotypes  
66 of the virus. Infections with coronaviruses, parainfluenzaviruses, RS-viruses and multiple other common-  
67 cold-viruses seem to usually result in short-term immunity, that declines over time.

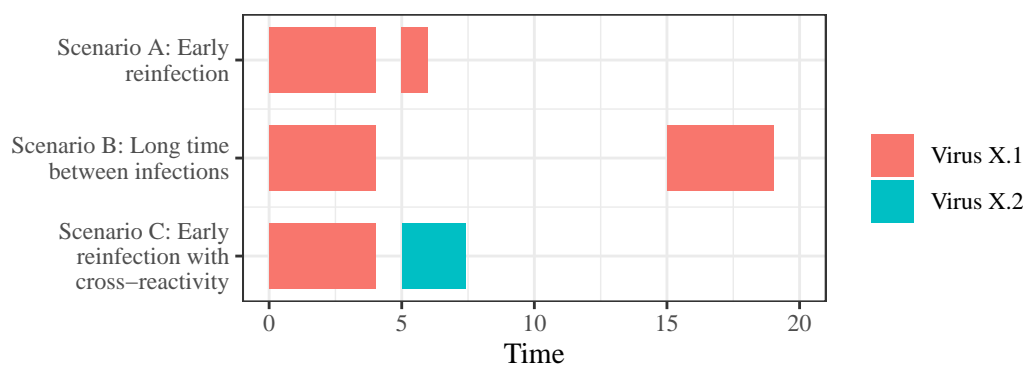

**Figure 1.** Schematic representation of different hypothetical scenarios for immunity upon reinfection with an exemplary virus denoted by “X” on a time scale without units. In scenario A, upon immediate reinfection with strain “X.1” of the exemplary virus “X”, symptoms are likely to be mild and the infection is usually short or the infection might even be asymptomatic. In scenario B the time between infections is long, and immunity will likely be lost for many viruses and duration of the infection would be long again and might be associated with more severe symptoms. Scenario C considers reinfection with an exemplary strain “X.2” of virus X. In this case there might be some cross-reactivity, which alleviates symptoms in case of infection with the related virus strain “X.2”.

68 There is a large corpus of mathematical models describing the dynamics of infectious diseases in a  
69 population. Among these models, the classical Susceptible-Infected-Recovered (SIR) epidemic model  
70 introduced by (Kermack and McKendrick, 1932) holds a prominent place. It is an ordinary differential  
71 equation (ODE) model, in which a susceptible fraction of the population (compartment **S**) can get infected  
72 with an infectious disease and hence transition to compartment **I**. Finally, individuals in compartment **I**  
73 recover and hence pass into compartment **R**, in which they are immune to the infectious disease. There  
74 are numerous variants of this model. One variant that is relevant in the context of this paper is the SIRS  
75 model, in which immunity in compartment **R** is lost with a certain rate and individuals hence transition  
76 from compartment **R** back into compartment **S**. Another variant of the SIR model is the SIS model  
77 (first described by Weiss and Dishon, 1971), in which no immunity is acquired (no compartment **R**) and  
78 individuals pass directly into compartment **S** when recovering.

## 79 1.2 Objectives

80 The relation between disease burden per capita per time (referred to as *mean/average disease burden*  
81 from hereon) and the exposure frequency to particular viruses typically causative of common colds has  
82 not been explicitly studied. Exposure frequency may depend among other aspects on overall interpersonal  
83 contact patterns and contact reduction strategies of infected individuals. In a certain range, increased  
84 exposure likely increases the spread of viral disease and, thus, increases the mean disease burden for most  
85 viruses causing common colds. However, we want to investigate if this relation might reverse under certain  
86 circumstances, if a critical exposure frequency is exceeded due to increased training of the immune system.  
87 In other words, more contacts and hence more exposure to pathogen might strengthen the immune system  
88 so that for some pathogens the disease burden related to this virus might be reduced. Even though this  
89 seems plausible, there are neither reliable epidemiological data available demonstrating such an effect for  
90 the common cold, nor has this aspect been studied explicitly in a mathematical modeling framework to our  
91 knowledge.

92 Therefore, we aim to investigate this hypothesis by applying a mathematical modeling approach.  
93 Mathematical models express hypotheses in formal, quantitative terms and can be used to evaluate

94 the implications of different hypotheses and design informative experiments. In the following, we present  
95 two novel, related mathematical models in order to address the aforementioned research question.

96 In our analysis, we consider an exemplary virus that can cause an upper respiratory infection. The  
97 proposed methods can be applied to any real common cold pathogen by choosing appropriate parameter  
98 configurations or estimating them from respective data. Our goal is to find a simple and universal  
99 mathematical framework that describes the progression of the common cold rather than the precise  
100 analysis of one specific pathogen.

101 The first model that we call **CC-ODE model** (*common cold ordinary differential equation model*) is an  
102 ODE model based on the SIRS model. A formal description of the model can be found in section 2.1 and  
103 analysis results in section 3.1. The second model is an individual-based model derived from the SIS model  
104 and is referred to as **CC-IB model** (*common cold individual-based model*). It is described in section 2.2  
105 and section 3.2. Individual-based models allow to follow individuals and their properties (DeAngelis  
106 and Grimm, 2014). Thereby, they are capable of representing stochasticity and autonomy of individuals.  
107 Complex, non-linear phenomena may emerge as a result of individuals that follow simple rules.

108 Our work is based on the prototypical SIR model family, which allows for an easy connection and  
109 integration into the current scientific discourse. In case of the ODE approach, the plain SIR model cannot  
110 account for loss of immunity, which is essential to the goals of the work presented in this paper. Therefore,  
111 we choose the slightly more complex SIRS model, in which immunity can be lost. In case of the individual-  
112 based approach, complex phenomena can be represented by individual states of immunity. Hence, the  
113 explicit modeling of the **R** compartment is not necessary and the SIS model is sufficient as a basis. The  
114 two chosen modeling approaches shall complement each other, the CC-ODE model being better suited for  
115 deriving analytical results in closed form and deriving population-centered results, while the CC-IB model  
116 inherently allows to represent heterogeneity among individuals, stochasticity and tracking of individual  
117 fates.

## 2 METHODS

### 118 2.1 CC-ODE model

119 In this section, the **CC-ODE model** (*common cold ordinary differential equation model*) is presented  
120 and described. It is an ODE model based on the SIRS model, a classical model describing the dynamics  
121 of an infectious disease on a population level. In the SIRS model, individuals can switch between three  
122 different compartments. First, the susceptible individuals are in compartment **S**. They do not carry the  
123 disease and can potentially get infected. The number of individuals in this compartment at time  $t$  is given  
124 by  $S = S(t)$ . Second, the infected individuals are in compartment **I** and can spread the disease. The  
125 number of individuals in this compartment at time  $t$  is denoted by  $I = I(t)$ . Third, the recovered (and  
126 immune) individuals are in compartment **R**. They can neither acquire nor spread the disease and the  
127 number of individuals at time  $t$  reads  $R = R(t)$ . The total number of individuals  $N(t) = S + I + R$  is fixed  
128 (phenomena such as birth, death and migration are not included in the model). For reasons of simplicity,  
129 we assume  $N = 1$  so that  $S$ ,  $I$  and  $R$  can be interpreted as proportions of a population that is constant in  
130 size. The model equations read

$$\begin{aligned}\frac{dS}{dt} &= -\beta IS + \delta R \\ \frac{dI}{dt} &= \beta IS - \gamma I \\ \frac{dR}{dt} &= \gamma I - \delta R\end{aligned}\tag{1}$$

131 with initial conditions  $S(0)$ ,  $I(0)$  and  $R(0)$ . The model parameters are

- 132 •  $\beta \geq 0$ : infection rate (influenced by contact rate and infectivity of the pathogen),
- 133 •  $\gamma \geq 0$ : recovery rate,
- 134 •  $\delta \geq 0$ : immunity loss rate.

135 Note that by setting  $\delta = 0$  we obtain the basic SIR model. This model describes the dynamics of a  
136 population exposed to one single virus without interaction to other pathogens or concurrent virus strains.  
137 An infection with this virus (strain) can lead to immunity that eventually subsides, which holds true for  
138 most common cold pathogens.

139 To investigate if a higher contact rate can eventually lead to a reduced overall disease burden, we introduce  
140 some amendments of the equations and parameters leading to an ODE model, which we call *CC-ODE*  
141 *model*. We assume that an increase of the contact rate leads to shorter (or less intense) infections due to  
142 development of specific immunity. Hence, the higher the contact rate, the higher also the recovery rate.  
143 However, there is no evidence that the infectivity of the pathogen should also affect the recovery rate. This  
144 is why we split the infection rate  $\beta$  into two independent factors that describe the infection rate by a contact  
145 rate ( $\beta_2$ ) and a measure of infectivity ( $\beta_1$ ), which can be interpreted as the probability of infection upon  
146 exposure:

$$\beta = \beta_1 \cdot \beta_2.$$

147 In order to represent the possibility of development of specific immunity to the pathogen (= habituation  
148 effect), we introduce the parameter  $\alpha$  representing the immunogenicity of the virus, giving rise to an  
149 additional term  $\alpha\beta_2 I$  in the model equations:

$$\begin{aligned}\frac{dS}{dt} &= -\beta_1\beta_2 IS + \delta R \\ \frac{dI}{dt} &= \beta_1\beta_2 IS - (\gamma + \alpha\beta_2)I \\ \frac{dR}{dt} &= (\gamma + \alpha\beta_2)I - \delta R\end{aligned}\tag{2}$$

150 with the additional model parameters

- 151 •  $\beta_1 \geq 0$ : infectivity,
- 152 •  $\beta_2 \geq 0$ : contact rate,
- 153 •  $\alpha \geq 0$ : immunogenicity, i. e. a measure of the degree of development of specific immunity to the  
154 pathogen in the population upon exposure.

155  $\beta_1$  depicts the infectivity of the pathogen. Large values of  $\beta_1$  correspond to highly contagious diseases.  
156 The contact rate  $\beta_2$  describes the number of contacts per individual in society, with high values indicating a  
157 very active population with many contacts. In this way, the higher both of these parameters, the higher the  
158 total infection rate. If  $\beta_1 = 0$  (non-contagious disease) or  $\beta_2 = 0$  (absolute isolation), there is no spread of  
159 the disease. The parameter  $\alpha$  describes the immunogenicity of the virus, i. e. the immunological habituation  
160 effect of the specific immune system against the virus in question. For  $\alpha = 0$ , there is no development of  
161 specific immunity at all and we obtain the classical SIRS model. For  $\alpha \rightarrow +\infty$  and  $\beta_2 > 0$ , development  
162 of specific immunity is so effective that infections are eliminated immediately.

163 This model is applied to describe the dynamics of the common cold on a *population level*. We aim to  
164 investigate the disease dynamics in the CC-ODE model by introducing an infection into a small proportion  
165 of a population without prior immunity. Thus, the initial conditions read  $S(0) = 0.99$ ,  $I(0) = 0.01$  and  
166  $R(0) = 0$  for all our simulations of the CC-ODE model. In the following section, we present a novel  
167 agent-based model focusing on the *individual level*.

## 168 2.2 CC-IB model

169 The **CC-IB model** (*common cold individual-based model*) is derived from the SIS model, in which the  
170 compartment with recovered individuals is omitted. In order to facilitate a translation into a corresponding  
171 individual-based model, the number of individuals  $N$  is not set to 1 as in the previous section. Instead, we  
172 are dealing with a fixed number  $N > 1$  of individuals. The dynamics of the SIS model are described by the  
173 following equations:

$$\begin{aligned}\frac{dS}{dt} &= -\beta S \frac{I}{N} + \gamma I \\ \frac{dI}{dt} &= \beta S \frac{I}{N} - \gamma I\end{aligned}\tag{3}$$

174 As in the SIR model, the parameter  $\beta$  determines infection rate (composed of number of contacts per  
175 person per time and the contagion infectivity), while the parameter  $\gamma$  determines the recovery rate.

176 The CC-IB model is derived from this model by assuming a population of  $N$  individuals, which can  
177 switch between **S** and **I** according to probabilistic rules. Each individual can have an individual value for  
178 the infection rate  $\beta$ , the value of the  $i$ -th individual denoted  $\beta_i$  ( $i = 1, 2, 3, \dots, N$ ). Since the infectivity of a  
179 virus is an inherent, non-changing property of a specific virus, modulations of  $\beta_i$  directly represent changes  
180 in the contact rate in the model. The model operates on a discrete time-scale. Each timestep, an individual  
181 in **S** acquires an infection (and hence switches to **I**) with probability  $\beta_i I/N$ :

182 A diseased individual currently residing in **I** recovers (and hence switches to **S**) with a probability that  
183 is given by a transition function  $f(\theta_i)$  per timestep, where  $\theta_i$  denotes the time since the last recovery of  
184 the  $i$ -th individual.  $f(\theta_i)$  is defined as the sum of a term representing the ability of the untrained immune  
185 system to clear an infection ( $c$ ) and a term representing immunity due to previous exposure to the virus.  
186 The term representing specific immunity decays exponentially with rate  $d\theta_i$ , where  $d$  defines the timescale  
187 of the immunological memory:

$$f(\theta_i) = a \exp(-d\theta_i) + c$$

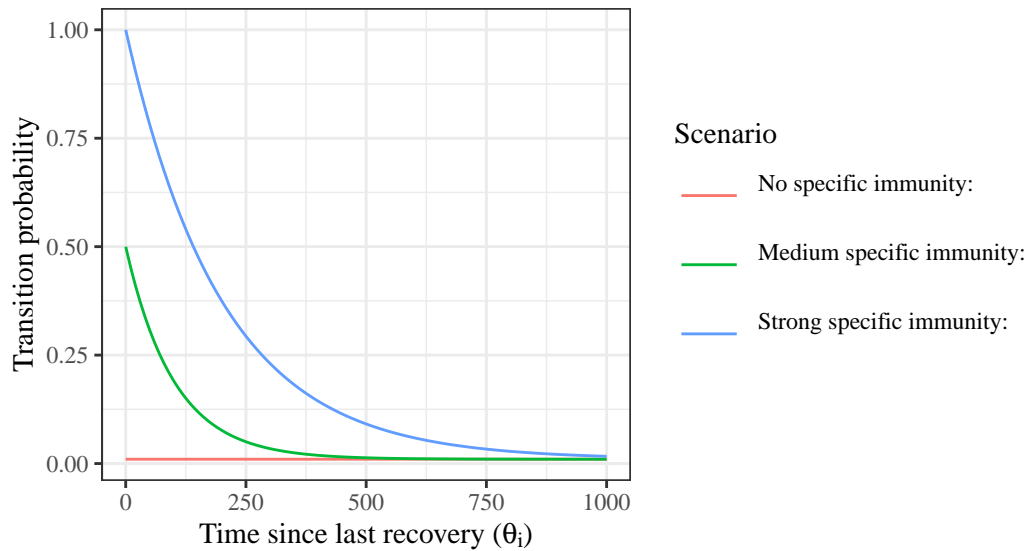

**Figure 2.** Transition function for the chosen scenarios that are analyzed subsequently. In the first scenario, no training of the immune system is assumed (red line). In the second scenario, it is assumed that an infection results in a mild immunity, which is decaying with time (green line). In the third scenario, it is assumed that infection results in a strong immunity, which, however, is also decaying with time (blue line).

188 Hence, in summary for each individual identified by index  $i$ , the probabilities to switch from one state to  
 189 the other read as follows:

$$\begin{aligned}
 p_{\mathbf{S} \rightarrow \mathbf{I}} &= \beta_i / N \\
 p_{\mathbf{I} \rightarrow \mathbf{S}} &= f(\theta_i) \\
 &= a \exp(-d\theta_i) + c
 \end{aligned} \tag{4}$$

190 In the simulations, three different parameterizations of  $f(\theta_i)$ , i. e. three different sets of values for  $a$ ,  
 191  $d$  and  $c$ , are considered, corresponding to scenarios denoted “No specific immunity” ( $a = 0$ ,  $d = 0.01$ ,  
 192  $c = 0$ ), “Medium specific immunity” ( $a = 0.49$ ,  $d = 0.1$ ,  $c = 0.01$ ) and “Strong specific immunity”  
 193 ( $a = 0.99$ ,  $d = 0.05$ ,  $c = 0.01$ ). The resulting transition functions are visualized in figure 2 .

194 The CC-IB model is simulated 10,000 timesteps via Monte Carlo simulations. The population is comprised  
 195 of 50 “test individuals”, whose trajectory is followed individually in graphical representations, and 950  
 196 additional individuals ensuring a sufficient population size. In the test individuals,  $\beta_i$  ranges from 0.001 to  
 197 0.5 equally spaced on a log scale. In the additional individuals,  $\beta_i$  is sampled from a log-normal distribution  
 198 with  $\mu = -4$  and  $\sigma = 1$ . Initially, without loss of generality, 10 randomly chosen individuals are infected  
 199 ( $I(0) = 10$ ), the other individuals are susceptible ( $S(0) = 990$ ). It is assumed that none of the individuals  
 200 have been exposed to the virus before ( $\theta_i = \infty$  for all individuals initially).

201 A graphical overview of the two presented models and their underlying variants can be found in figure 3.

### 3 RESULTS

#### 202 3.1 CC-ODE model

203 The model dynamics for some parameter choices of  $\alpha$  and  $\beta_2$  are shown in figure 4. The parameters  $\alpha$   
 204 and  $\beta_2$  are of primary interest in this study and are varied systematically in the following. The parameters  
 205  $\beta_1$ ,  $\gamma$  and  $\delta$  are held constant ( $\beta_1 = 0.7$ ,  $\gamma = 0.1$  and  $\delta = 0.1$ ) in the presented analysis in order to reduce

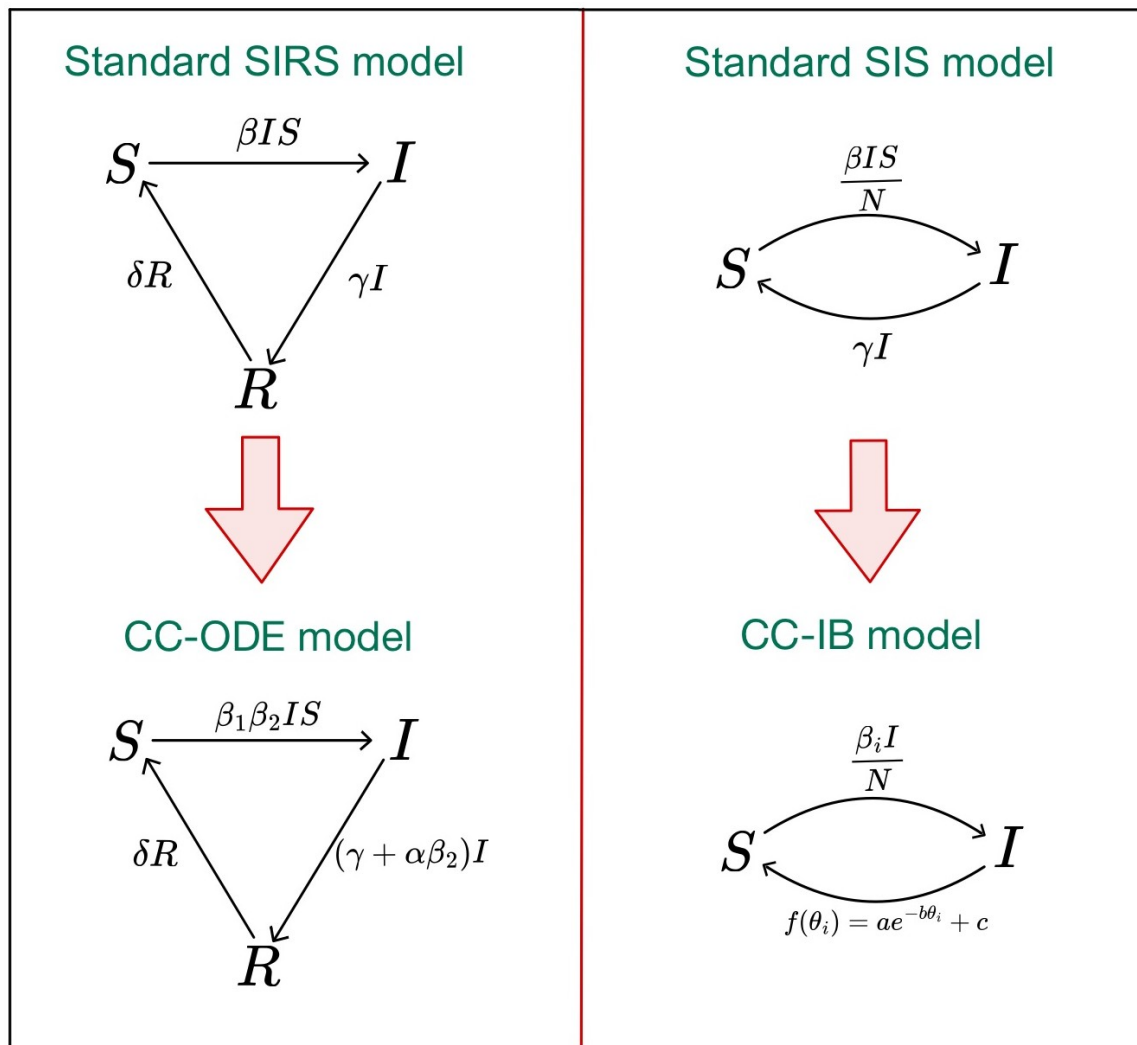

**Figure 3.** Overview of the underlying standard SIRS model (upper left corner) and standard SIS model (upper right corner), as well as the novel developed CC-ODE model (lower left corner) and CC-IB model (lower right corner). The complete model equations can be found in equation 1 (SIRS model), equation 2 (CC-ODE model), equation 3 (SIS model) and equation 4 (CC-IB model).

206 complexity, but could in principle be estimated from biological data, in case it is available for specific  
 207 viruses.

208 As one would expect, with an increasing value of  $\alpha$  and constant values for all other parameters, there  
 209 are more susceptible and less infected individuals. The dynamics for varying  $\beta_2$  appear to be a bit more  
 210 complex and depend essentially on the choice of  $\alpha$ . To further investigate this, we have a closer look on the  
 211 steady states of the ODE system. There are two steady states of the ODE system. One of them is the trivial  
 212 steady state  $(S^*, I^*, R^*) = (1, 0, 0)$ , in which there are solely susceptible individuals in  $\mathbf{S}$ , while there are  
 213 neither infected nor immune individuals in the population. Hence, there is no infection at all that could be  
 214 spread and the entire population remains susceptible and healthy. The condition

$$\beta_2(\beta_1 - \alpha) - \gamma > 0$$



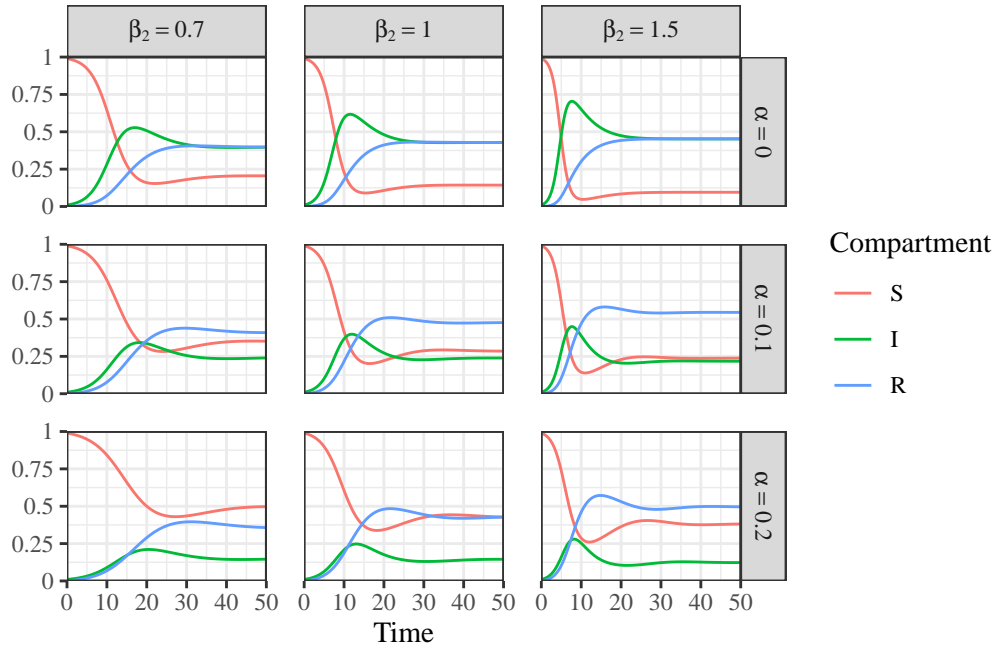

**Figure 4.** Solutions of CC-ODE model for  $t \in [0, 50]$  with initial conditions  $S(0) = 0.99, I(0) = 0.01, R(0) = 0$ , parameter values  $\beta_1 = 0.7, \gamma = \delta = 0.1$  and different choices for  $\alpha \in \{0, 0.1, 0.2\}$  and  $\beta_2 \in \{0.7, 1.0, 1.5\}$ .

215 ensures instability of the trivial steady state  $(S^*, I^*, R^*) = (1, 0, 0)$  and hence the basic reproduction  
 216 number reads

$$\mathcal{R}_0 = \frac{\beta_2(\beta_1 - \alpha)}{\gamma}.$$

217 As a consequence, there is a disease outbreak, if  $\mathcal{R}_0 > 1$ . Otherwise, an introduction of the virus to  
 218 a small part of the population leads to the extinction of the disease. On the one hand, the higher the  
 219 probability of infection upon exposure  $\beta_1$  and contact rate  $\beta_2$ , the higher the chance that the disease is  
 220 breaking out. On the other hand, the greater the immunogenicity of the virus  $\alpha$  and the recovery rate  $\gamma$ , the  
 221 lower the the probability that the disease is breaking out. This coincides well with the intuitive notion of  
 222 these model parameters.

223 Additionally, there is another steady state, which is non-trivial:

$$\begin{pmatrix} S^* \\ I^* \\ R^* \end{pmatrix} = \begin{pmatrix} \frac{\alpha\beta_2 + \gamma}{\beta_1\beta_2} \\ -\frac{\delta(\alpha\beta_2 - \beta_1\beta_2 + \gamma)}{\beta_1\beta_2(\alpha\beta_2 + \gamma + \delta)} \\ -\frac{(\alpha\beta_2 + \gamma)(\alpha\beta_2 - \beta_1\beta_2 + \gamma)}{\beta_1\beta_2(\alpha\beta_2 + \gamma + \delta)} \end{pmatrix}.$$

224 In the following, we focus on this second steady state. Thereby, we further investigate  $I^*$  and its behavior  
 225 depending on the parameters  $\alpha$  and  $\beta_2$ , see figure 5 a).  $I^*$  can be interpreted as the proportion of infected  
 226 individuals in the long term and is therefore a suitable representation of the mean disease burden after an  
 227 initial period. For  $\alpha > 0$ , we obtain curves with one single maximum at

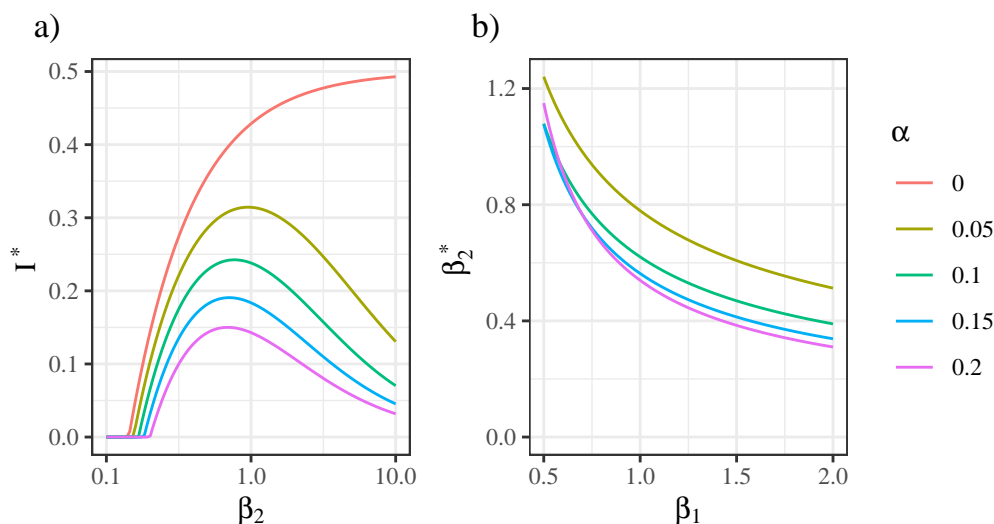

**Figure 5.** a) Analytical solutions of steady state component  $I^*$  (infected individuals) vs. log-scaled contact rate  $\beta_2$  and  $\beta_1 = 0.7$ . b) Maximum location of steady state  $\beta_2^*$  vs. pathogen infectivity  $\beta_1$ . The colors code for different choices of the immunogenicity  $\alpha$ . Other parameter values are  $\gamma = \delta = 0.1$ .

$$\beta_2^* = \frac{\alpha\gamma + \sqrt{\alpha^2\gamma\delta + \alpha\beta_1\gamma^2 + \alpha\beta_1\gamma\delta}}{\alpha\beta_1 - \alpha^2}.$$

228 Hence, for  $\beta_2 > \beta_2^*$ , there is a decrease of  $I^*$  and thus of the number of infections in the long term.  
 229 Depending on the specific characteristics of a virus and the resulting different parameters in the ODE  
 230 model, a higher contact rate of the individuals can lead to an overall lower disease burden. That is, having  
 231 overall more contacts helps to reduce the average disease burden, if there is sufficient development of  
 232 specific immunity. Interestingly, with increasing probability of infection upon exposure  $\beta_1$  the location  
 233 of the maximum  $\beta_2^*$  is decreasing, see figure 5 b). This means that for pathogens with higher probability  
 234 of infection upon exposure, it might be the better strategy to have also a higher contact rate to keep the  
 235 average disease burden lower. Note, however, that this may not be reasonable for all diseases. The stability  
 236 analysis of the steady states can be found in the supplementary material.

237 In order to shed more light on the dynamics at the individual level, we investigate the behavior of the  
 238 individual-based model (CC-IB model) in the following.

### 239 3.2 CC-IB model

240 For the CC-IB model, we evaluate three scenarios corresponding to different patterns of immunity  
 241 development (no specific immunity, medium specific immunity, strong specific immunity). The number  
 242 of persons in the compartments **S** and **I** over time is depicted in figure 6. It can be seen that in all three  
 243 scenarios, the fraction of infected individuals ( $I/N$ ) oscillates around an equilibrium point.

244 In order to illustrate the model dynamics, relation between the infection rate and the mean residence time  
 245 in the two compartments is visualized in figure 7. For compartment **S**, we can observe that individuals with  
 246 large values for  $\beta_i$  tend to have longer residence times. This is to be expected, as exposure to the infectious  
 247 virus is less likely for small values of  $\beta_i$ . The transition from **S** to **I** is identical for all three scenarios,  
 248 so that there are no relevant differences between the three scenarios in this regard. In contrast, the mean  
 249 residence time in **I** displays important differences between the three scenarios. In scenario ‘No specific

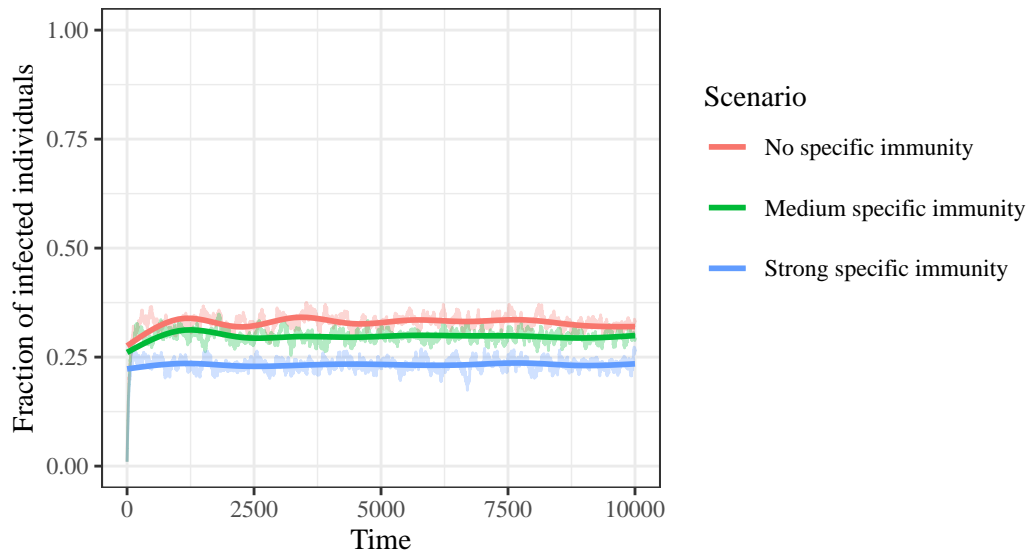

**Figure 6.** Dynamics in the compartments. The system oscillates around an infection level of about 25% in all three scenarios. The solid line is based on locally estimated scatter plot smoothing. The qualitative system dynamics are independent of the starting conditions, provided extinction of the disease does not occur (simulations not shown).

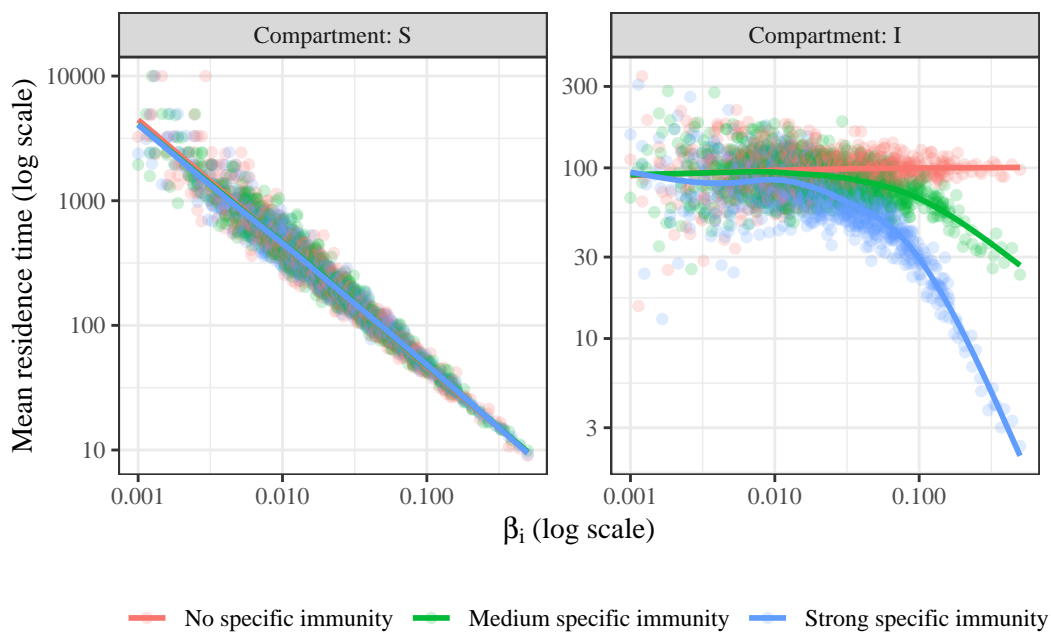

**Figure 7.** Mean residence times in the compartments S and I. For all individuals, the mean residence times in S and I have been calculated and plotted as individual dots on log scale versus the infection rate  $\beta_i$  on log scale. The solid lines are based on locally estimated scatter plot smoothing.

250 immunity’, the duration of infections (= residence time in I) shows no dependence of the infection rate.  
 251 For scenario “Medium specific immunity”, it can be seen that individuals with a higher infection rate (large  
 252  $\beta_i$ ) tend to have shorter infections. This relation is even more pronounced in the scenario “Strong specific  
 253 immunity”.

254 In figure 8, we show individual trajectories for the time interval from  $t = 9000$  to  $t = 10000$ . It becomes  
 255 clear that in all three scenarios, individuals with a small  $\beta_i$  are rarely infected and individuals with larger  $\beta_i$

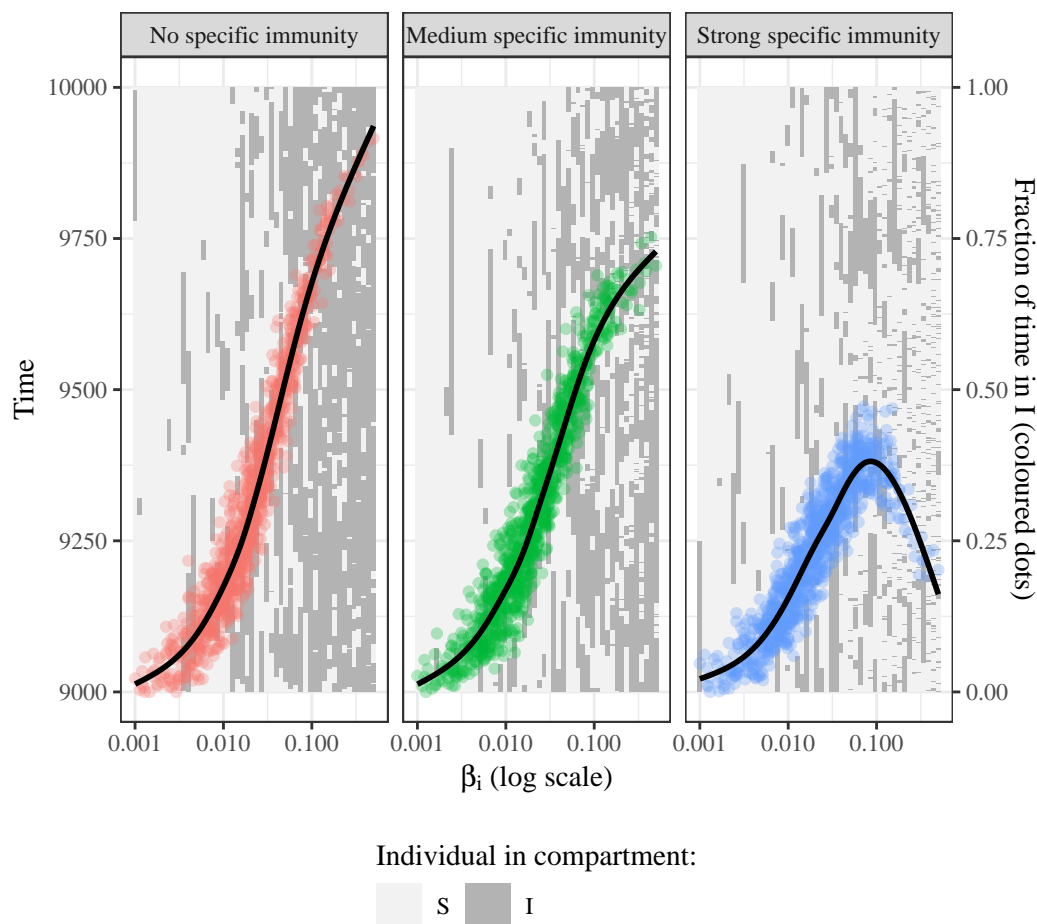

**Figure 8.** Trajectories of test individuals and mean disease burden. In this figure, time is plotted from bottom to top. Each column corresponds to a simulated test-individual with a particular value for  $\beta_i$ . At the times marked dark gray, the individual is in I, at the times marked light gray in S. The colored dots and the black trend lines indicate the fraction of time spent in I with respect to the entire simulation time. The corresponding scale is on the right hand side of the figure.

256 have infections more frequently. In the first scenario (“No specific immunity”), the duration of infections is  
257 independent of  $\beta_i$ . In the second scenario (“Medium specific immunity”), infections appear to be shorter for  
258 larger values of  $\beta_i$ . In the third scenario (“Strong specific immunity”), this notion becomes more evident.  
259 In this scenario, the total time spent in state I first increases with increasing infection rate  $\beta_i$ . For large  
260 values of  $\beta_i$ , infections are frequent, however, tend to be short in duration.

261 The fraction of time spent in I in the simulation interval ( $t$  from 0 to 10000) is chosen as a proxy for  
262 mean disease burden per time. The fraction of time spent in I is the product of the number of infections and  
263 the mean residence time divided by the total time. In the scenarios “No specific immunity” and “Medium  
264 specific immunity”, there is a monotonous trend to increase with greater  $\beta_i$  (see trend line and colored dots  
265 in figure 8). However, in the scenario “Strong specific immunity”, the mean disease burden tends to decline  
266 once the infection rate  $\beta_i$  (and hence the contact rate) surpasses a certain value of  $\beta_i$ . Hence, we confirm  
267 in our model analysis that also in populations that are heterogeneous with respect to their contact rates,  
268 an increased exposure frequency can lead to a decreased mean disease burden for appropriate parameter  
269 configurations, as already examined for the CC-ODE model.

## 4 DISCUSSION

270 The common cold causes considerable human distress and imposes substantial economic costs. It is  
271 widely assumed that adopting contact reduction, physical distancing and disinfection measures can reduce  
272 infections and that these measures are suited to reduce associated human suffering and economic burden.  
273 Although this may be true in many circumstances, it is not clear if this reasoning is universally valid.  
274 Interestingly, the relation between exposure frequency and mean disease burden has not been studied  
275 explicitly from a mathematical modeling perspective before.

276 In this paper, we present novel mathematical approaches that study the relation between pathogen  
277 exposure frequency and mean disease burden. We deliberately kept the presented approaches simplistic,  
278 yet they yield informative insights. Specifically, in this work we introduce an ordinary differential equation  
279 model derived from the SIRS model and an individual-based model derived from the SIS model. We apply  
280 the models to different theoretical scenarios in order to investigate this relationship.

281 In both modeling approaches, we demonstrate that for appropriate parameter constellations (i. e. properties  
282 of the virus and the population) an increased exposure may lead to a reduced mean disease burden. This  
283 can be explained by an efficient training of the immune system in the case of frequent infections. On the  
284 contrary, by reducing the number of infections, development of adequate immunity on an individual and  
285 population level may be hampered. Therefore, parameter configurations with high habituation rates arise,  
286 for which our models predict a reduced mean symptom burden with an increased exposure to a particular  
287 common cold virus, both on population and individual level. It is important to note that our models rely  
288 on the assumption that every exposure to the virus, even if it is not linked to a symptomatic infection  
289 (CC-ODE model) or associated with only a very short infection (CC-IB model) leads to full immunization.  
290 Further modeling analyses could be targeted at investigating the effect of relaxing this assumption.

291 For the novel CC-ODE model, the resulting properties and overall model behavior can be calculated  
292 analytically for given parameter configurations as demonstrated in section 3.1. While an absolute isolation  
293 of contagious individuals always leads to zero infections, this radical strategy is connected to great economic  
294 cost and personal restrictions. For rather harmless diseases such as common colds, this strategy is certainly  
295 not practicable. On the contrary, the better option could be to increase the contact rate in order to reduce the  
296 overall disease burden (if practically feasible). We can observe a decreasing mean disease burden with a  
297 larger overall contact rate after a certain threshold for most parameter configurations. The optimal strategy  
298 highly depends on this threshold and is probably different for each pathogen and considered population.  
299 For most people, the number of contacts of each individual is limited by external circumstances in practice  
300 such as occupation and lifestyle and can only be manipulated at a certain cost to the individual. This has to  
301 be evaluated carefully for the specific scenario. It should be noted here that the increase in contact is only  
302 ethically justifiable if the death rate is close to zero. In the case of common cold pathogens this should  
303 usually hold true. However, we definitely do not want to recommend increasing the contact rate for serious  
304 illnesses, even if this could lead to fewer infections.

305 The CC-IB model allows for studying the effects of heterogeneity, e. g. regarding contact behavior and /  
306 or development of immunity after exposure. In the current approach presented in section 3.2, we introduce  
307 heterogeneity exclusively with respect to the contact rate. For reasons of simplicity, the development of  
308 immunity and the resulting recovery dynamics are assumed to be identical for all individuals. A further level  
309 of heterogeneity with regard to the recovery dynamics could be introduced in the model, but that was not  
310 necessary for the investigation of the hypothesis examined in this paper. Furthermore, the individual-based  
311 approach adds stochastic aspects, both for infection and recovery. Analogous to the CC-ODE model, the

312 results hint at the possibility that there might be constellations in which an increased exposure leads to a  
313 reduced mean disease burden with respect to specific viruses.

314 The parameters of the two models are related in a qualitative way. The infection rate  $\beta$  is described by  
315 infectivity  $\beta_1$  and the contact rate  $\beta_2$  in the CC-ODE model and by  $\beta_i$  in the CC-IB model. The specific  
316 immunogenicity is given by  $\alpha$  and  $a$ , respectively. The parameter  $\gamma$  in the CC-ODE model and the parameter  
317  $c$  in the CC-IB model correspond to the unspecific immunity. The time scale / duration of the immunity is  
318 modeled by the rate  $\delta$  in the population-based approach and by  $d$  in the individual-based approach.

319 In conclusion, the CC-ODE model is more targeted at global decision-making issues, that might arise  
320 in public health politics. This approach is more suited to derive public health strategies to reduce the  
321 average disease burden. On the contrary, if the concern is to give specific advice to patients, the CC-IB  
322 model can give more insightful recommendations. Furthermore, the individual-based model allows to study  
323 the dynamics of populations with heterogeneous contact rates, which is not possible with the ordinary  
324 differential equation approach presented in this paper. However, both models capture the notion that an  
325 increased exposure frequency leads to a reduced disease burden for certain parameter constellations. The  
326 models are rather simplistic in design and do not implement all possible facets of interaction between  
327 individuals and common cold viruses.

328 Up to this point, we have chosen illustrative model parameters for some generic common cold virus. In  
329 reality, there is a large diversity of the circulating virus. Furthermore, the ensemble of circulating viruses  
330 is not static but underlies constant development, in particular as a consequence of mutations of existing  
331 viruses and appearance of new viruses and virus variants from other species. The immunological memory  
332 within individuals and also within a population is shaped by the exposure to this multitude of different  
333 viruses. Furthermore, cross-immunity between different viruses and strains of viruses causing common  
334 colds may have a significant impact on disease patterns. These levels of complexity are currently not  
335 included in the presented modeling approaches. However, it is possible to make use of our models as a  
336 starting point and extend them to include multiple virus strains and interactions, for instance.

337 In case of the CC-ODE model, with knowledge of the average time of infection an estimate for the  
338 recovery rate  $\gamma$  can be provided, while the average time between infections determines the immunity loss  
339 rate  $\delta$ . The population numbers for the three different states over time and the basic reproduction number  
340 can help to determine the other parameters. Thereby, the parameter estimation also highly depends on  
341 the available data and the framework and one also has to consider the time scale and population size. In  
342 this way, a realistic scenario for an existing pathogen can be evaluated by fitting the model parameters.  
343 As a consequence, the model predictions could be challenged, in particular the hypothesis that a higher  
344 frequency of exposure can lead to a lower mean disease burden.

345 In the case of common cold pathogens that do not lead to protective immunity (e. g. parainfluenza viruses,  
346 metapneumoviruses), there is insufficient evidence and data to answer the following hypothetical question:  
347 Would a person exposed to a specific common cold pathogen (e. g. a particular rhinovirus) at high frequency  
348 (e. g. once a day / hourly) experience persistent corresponding symptoms? Furthermore, the impact of  
349 cross-reactivity between different virus serotypes is also not well-studied. For non-common-cold infectious  
350 agents, there is a small number of studies systematically investigating intensity of symptoms upon repeated  
351 exposure (Dittmer et al., 1995; Hattakam et al., 2021; De Angelis et al., 2021; Frumento et al., 2022).

352 During the COVID-19 pandemic, many regions were subject to long-lasting, extensive contact restrictions,  
353 particularly in the winters of 2020/2021 and 2021/2022. As a consequence of the reduced contacts, the  
354 incidence of common colds has dropped during this time. This is presumably linked to a general decline in

355 the population's immunity to cold viruses. In the winter 2022/2023, an increased number of sick days due  
356 to common colds was observed in the communities where the contact rates had been lower in the preceding  
357 years. This can be explained in a straight-forward manner with the presented models.

358 In order to test the results derived in this analysis, different experimental strategies are conceivable. First,  
359 in an animal study, animals could be repeatedly infected with a typical common cold virus (e. g. a rhinovirus)  
360 in a controlled setting, systematically varying the time interval between subsequent infections and recording  
361 the intensity of the disease symptoms. Appropriate animal models have been described in the literature  
362 (Yin and Lomax, 1986). Second, humans could be repeatedly infected with different time intervals with a  
363 mild common cold virus. In an investigation studying the relation between sleep duration and intensity of  
364 symptoms of a common cold, the authors chose such an approach (Prather et al., 2015). From our point of  
365 view, however, it is questionable whether such a procedure is ethically justifiable for our research question  
366 for both animal and human studies, as even generally mild pathogens can lead to more severe courses  
367 of disease in rare cases. A third conceivable approach is to collect observational data from groups with  
368 different exposure rates to common cold viruses via questionnaires. The exposure frequency most likely  
369 varies considerably between different professions. An attempt could be made to quantify the exposure  
370 and symptom burden of common cold infections in a prospective longitudinal study, ideally including  
371 participants with a wide range of different contact behaviors. A fourth approach might be related to a more  
372 comprehensive surveillance of common cold pathogens by federal agencies, as is already being done (e. g.  
373 weekly reports by the Robert-Koch-Institut in Germany - <https://influenza.rki.de/Wochenberichte.aspx>).

374 A general increase of contacts in order to stimulate training of the specific immunological defense seems  
375 neither feasible nor desirable. Foremost, there are not only mild pathogens in circulation. Viruses such  
376 as SARS-CoV-2 and influenza lead to severe, often life-threatening and in many cases lethal infections.  
377 The presence of dangerous infectious agents is prohibitive of calling for a general increase of contacts.  
378 Nonetheless, the considerations raised in this article raise the question of whether the repertoire of infectious  
379 agents to which the immune system is exposed could be specifically targeted in a novel way. In certain  
380 environments such as childcare facilities or schools, for example, constellations are conceivable in which  
381 avoiding contact (as oftentimes recommended in the cold seasons) could lead to a worsening of the  
382 disease burden due to common colds. Loosely speaking, an infection with a benign pathogen that can be  
383 successfully averted today might be the common cold of tomorrow with more severe symptoms due to a  
384 prospective decreased specific immunity.

385 Another measure to increase specific immunity against common cold pathogens and thereby reduce the  
386 associated disease burden are vaccination approaches (Simancas-Racines et al., 2017). However, such  
387 approaches have turned out to be challenging due to the multitude and ongoing evolution of the causative  
388 agents. To date, there are no such vaccines available that are recommended in the relevant guidelines. As  
389 common cold infections are usually mild, research in this field is limited and no groundbreaking innovations  
390 are to be expected in the near future.

391 In conclusion, a more detailed characterization of disease dynamics of the common cold seems worthwhile.  
392 To this end, more detailed observational and experimental data are required in order to facilitate more  
393 specific mathematical modeling approaches. More sophisticated mathematical models fitted to more precise  
394 data potentially allow to derive recommendations suited to decrease the disease burden associated with the  
395 common cold.

## REFERENCES

- 396 Arruda, E., Pitkäranta, A., Witek Jr, T. J., Doyle, C. A., and Hayden, F. G. (1997). Frequency and natural  
397 history of rhinovirus infections in adults during autumn. *Journal of clinical microbiology* 35, 2864–2868
- 398 Bramley, T. J., Lerner, D., and Sarnes, M. (2002). Productivity losses related to the common cold. *Journal*  
399 *of occupational and environmental medicine* , 822–829
- 400 De Angelis, M. L., Francescangeli, F., Rossi, R., Giuliani, A., De Maria, R., and Zeuner, A. (2021).  
401 Repeated exposure to subinfectious doses of sars-cov-2 may promote t cell immunity and protection  
402 against severe covid-19. *Viruses* 13, 961
- 403 DeAngelis, D. L. and Grimm, V. (2014). Individual-based models in ecology after four decades.  
404 *F1000prime reports* 6
- 405 Dittmer, U., Stahl-Hennig, C., Coulibaly, C., Nisslein, T., Lüke, W., Fuchs, D., et al. (1995). Repeated  
406 exposure of rhesus macaques to low doses of simian immunodeficiency virus (siv) did not protect them  
407 against the consequences of a high-dose siv challenge. *Journal of general virology* 76, 1307–1315
- 408 Frumento, N., Figueroa, A., Wang, T., Zahid, M. N., Wang, S., Massaccesi, G., et al. (2022). Repeated  
409 exposure to heterologous hepatitis c viruses associates with enhanced neutralizing antibody breadth and  
410 potency. *The Journal of Clinical Investigation* 132
- 411 Glanville, N., Mclean, G. R., Guy, B., Lecouturier, V., Berry, C., Girerd, Y., et al. (2013). Cross-serotype  
412 immunity induced by immunization with a conserved rhinovirus capsid protein. *PLoS pathogens* 9,  
413 e1003669
- 414 Hattakam, S., Elong Ngono, A., McCauley, M., Shresta, S., and Yamabhai, M. (2021). Repeated exposure  
415 to dengue virus elicits robust cross neutralizing antibodies against zika virus in residents of northeastern  
416 thailand. *Scientific Reports* 11, 9634
- 417 Heikkinen, T. and Järvinen, A. (2003). The common cold. *The Lancet* 361, 51–59
- 418 Kermack, W. O. and McKendrick, A. G. (1932). Contributions to the mathematical theory of epidemics.  
419 ii.—the problem of endemicity. *Proceedings of the Royal Society of London. Series A, containing papers*  
420 *of a mathematical and physical character* 138, 55–83
- 421 Murphy, K., Weaver, C., Berg, L., and Barton, G. (2022). *Janeway's Immunobiology* (W W Norton & Co  
422 Inc), 10 edn.
- 423 Passiotti, M., Maggina, P., Megremis, S., and Papadopoulos, N. G. (2014). The common cold: potential for  
424 future prevention or cure. *Current allergy and asthma reports* 14, 1–11
- 425 Prather, A. A., Janicki-Deverts, D., Hall, M. H., and Cohen, S. (2015). Behaviorally assessed sleep and  
426 susceptibility to the common cold. *Sleep* 38, 1353–1359
- 427 Simancas-Racines, D., Franco, J. V., Guerra, C. V., Felix, M. L., Hidalgo, R., and Martinez-Zapata, M. J.  
428 (2017). Vaccines for the common cold. *Cochrane Database of Systematic Reviews*
- 429 Thomas, M. and Bomar, P. A. (2022). *Upper Respiratory Tract Infection* (StatPearls Publishing, Treasure  
430 Island (FL))
- 431 Turner, R. B. (2015). The common cold. *Mandell, Douglas, and Bennett's principles and practice of*  
432 *infectious diseases* , 748
- 433 Weiss, G. H. and Dishon, M. (1971). On the asymptotic behavior of the stochastic and deterministic models  
434 of an epidemic. *Mathematical Biosciences* 11, 261–265
- 435 Yin, F. H. and Lomax, N. B. (1986). Establishment of a mouse model for human rhinovirus infection.  
436 *Journal of general virology* 67, 2335–2340
